# Supplementary material for: Adsorption of Mono- and Divalent Ions onto Dendritic Polyglycerol Sulfate (dPGS) as Studied Using Isothermal Titration Calorimetry
Source: MDPI journal article supplement (doi:10.3390/polym15132792), 2023-06-23
Supplement: s1 [file s1]

# SUPPLEMENTARY MATERIALS

## Adsorption of Mono- and Divalent Ions onto Dendritic Polyglycerol Sulfate (dPGS) as Studied Using Isothermal Titration Calorimetry

Jacek J. Walkowiak <sup>1,2,3,\*</sup>, Rohit Nikam <sup>4</sup> and Matthias Ballauff <sup>5</sup>

<sup>1</sup> DWI—Leibniz-Institute for Interactive Materials e.V, Forckenbeckstraße 50, 52074 Aachen, Germany

<sup>2</sup> Institute of Technical and Macromolecular Chemistry, RWTH Aachen University, Worringerweg 2, 52074 Aachen, Germany

<sup>3</sup> Aachen-Maastricht Institute for Biobased Materials (AMIBM), Maastricht University, Urmonderbaan 22, 6167 RD Geleen, The Netherlands

<sup>4</sup> Helmholtz-Zentrum Berlin für Materialien und Energie, Hahn-Meitner-Platz 1, 14109 Berlin, Germany; rohit.nikam@helmholtz-berlin.de

<sup>5</sup> Institut für Chemie und Biochemie, Freie Universität Berlin, Taktstraße 3, 14195 Berlin, Germany; mballauff@zedat.fu-berlin.de

\* Correspondence: walkowiak@dwil.rwth-aachen.de

### Single Set of Identical Binding Sites (SSIS) Model.

Subtracting equation (1) into equation (2) gives

$$[A]_{tot} = [A] + \frac{N \cdot K_b[A] \cdot [dPGS]}{1 + K_b[A]} \quad (S1)$$

Solving of equation (S1) for  $[A]$  leads to a quadratic equation

$$\theta^2 - \theta \left[ 1 + \frac{[A]_{tot}}{N[dPGS]} + \frac{1}{NK_b[dPGS]} \right] = 0 \quad (S2)$$

The heat  $Q'$  after each injection  $i$  is equal to

$$Q' = [dPGS]V_0N\theta\Delta H^{ITC} \quad (S3)$$

Solving the equation (S2) for  $\theta$  and then substituting this into equation (S3) gives

$$Q' = \frac{N[dPGS]\Delta H^{ITC}V_0}{2} \left[ 1 + \frac{[A]_{tot}}{N[dPGS]} + \frac{1}{NK_b[dPGS]} - \sqrt{\left( 1 + \frac{[A]_{tot}}{N[dPGS]} + \frac{1}{NK_b[dPGS]} \right)^2 - \frac{4[A]_{tot}}{N[dPGS]}} \right] \quad (S4)$$

The analysis includes the effect of the increase of the volume during titration [37,38]. The experimental data are fitted by calculating the heat change of the solution  $\Delta Q_i$  released with each injection  $i$  and corrected for displaced volume  $\Delta V_i$  as expressed in equation (4)

## ITC Isotherms

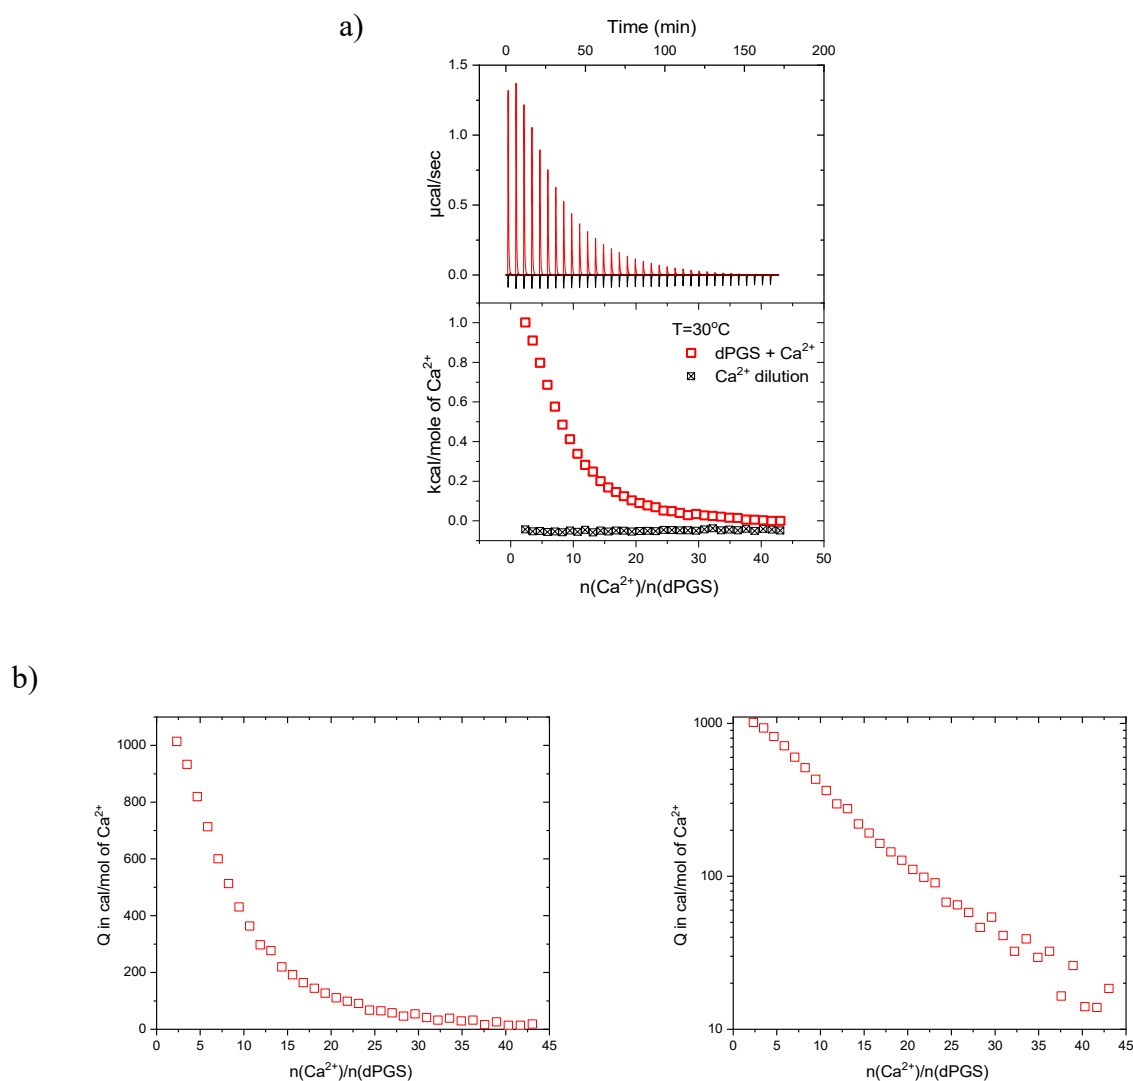

**Figure S1. (a)** ITC data for the binding of  $\text{Ca}^{2+}$  ions to dPGS at pH 7.2 and temperature of  $30^\circ\text{C}$  in 10 mM MOPS buffer. The upper panel shows the raw data of the binding (red spikes) and the dilution of  $\text{Mg}^{2+}$  by buffer (black spikes). The integrated heats of each injection are shown in the lower panel. **(b)** Binding isotherms for  $\text{Ca}^{2+}$  - dPGS interaction, presented on a typical ITC plot (left-handed) and semi-logarithmic plot (right-handed). Resulting  $[\text{Ca}^{2+}]_{\text{tot}}$ : 0.8 mM. Plots refer to section 3.1.

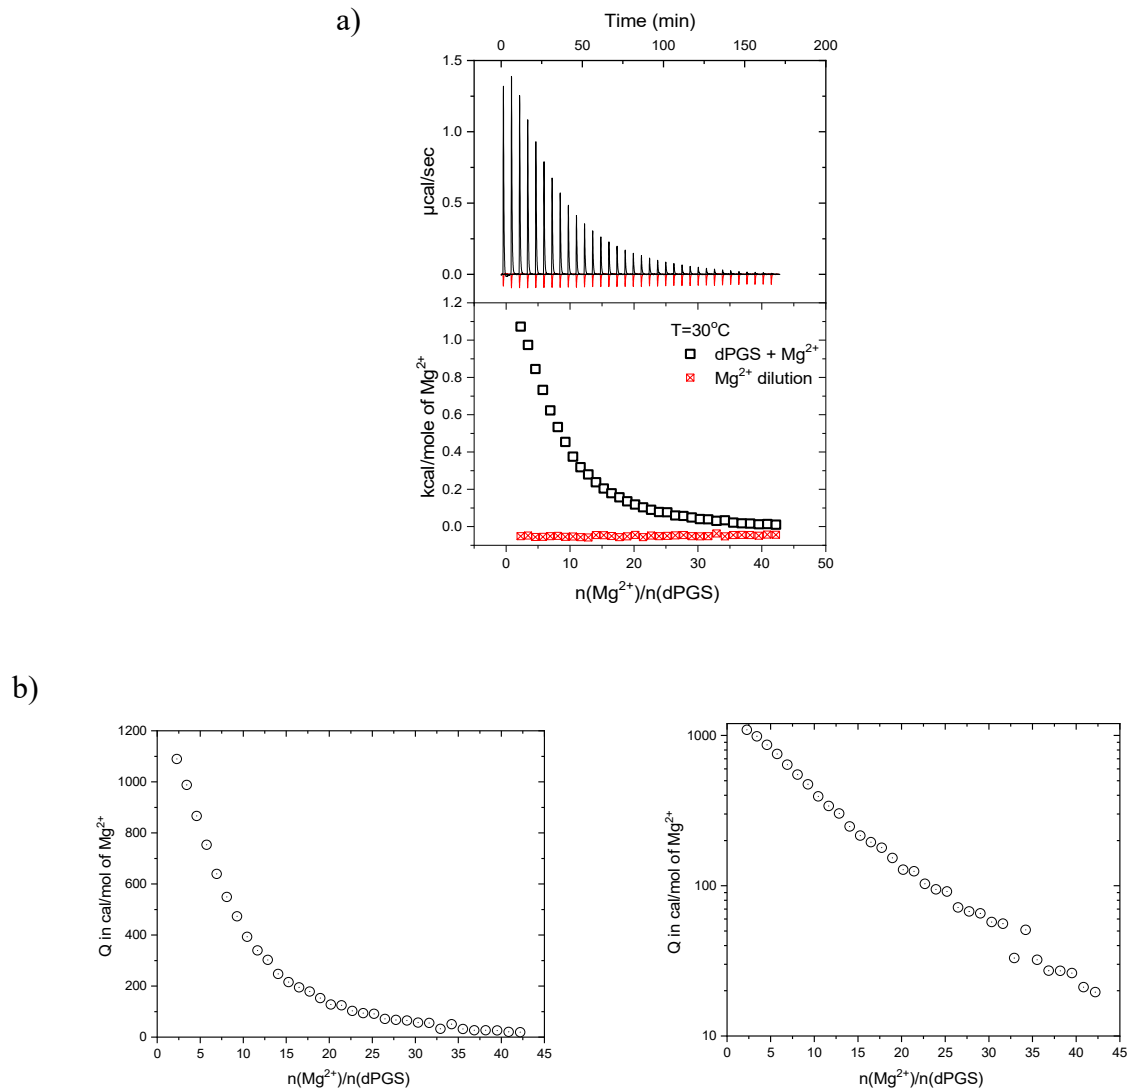

**Figure S2. (a)** ITC data for the binding of  $\text{Mg}^{2+}$  ions to dPGS at pH 7.2 and temperature of  $30^\circ\text{C}$  in 10 mM MOPS buffer. The upper panel shows the raw data of the binding (black spikes) and the dilution of  $\text{Mg}^{2+}$  by buffer (red spikes). The integrated heats of each injection are shown in the lower panel. **(b)** Binding isotherms for  $\text{Mg}^{2+}$  - dPGS interaction, presented on a typical ITC plot (left-handed) and semi-logarithmic plot (right-handed). Resulting  $[\text{Mg}^{2+}]^{\text{tot}}$ : 0.8 mM. Plots refer to section 3.1.

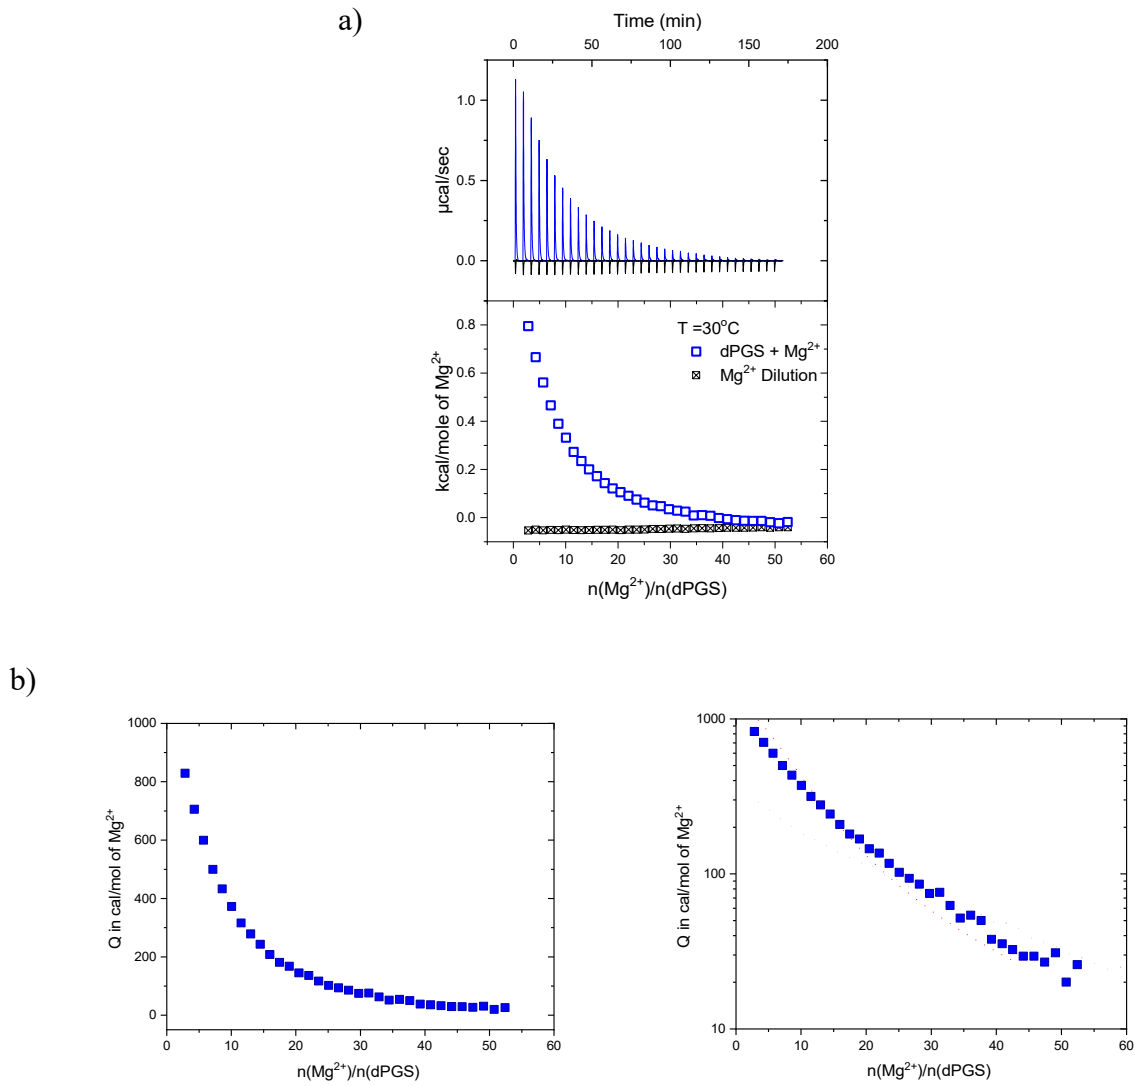

**Figure S3. (a)** ITC data for the binding of  $\text{Mg}^{2+}$  ions to dPGS at pH 7.2 and temperature of  $30^\circ\text{C}$  in 10 mM MOPS buffer. The upper panel shows the raw data of the binding (blue spikes) and the dilution of  $\text{Mg}^{2+}$  by buffer (black spikes). The integrated heats of each injection are shown in the lower panel. **(b)** Binding isotherms for  $\text{Mg}^{2+}$  - dPGS interaction, presented on a typical ITC plot (left-handed) and semi-logarithmic plot (right-handed). Resulting  $[\text{Mg}^{2+}]_{\text{tot}}$ : 0.8 mM. Plots refer to section 3.2.

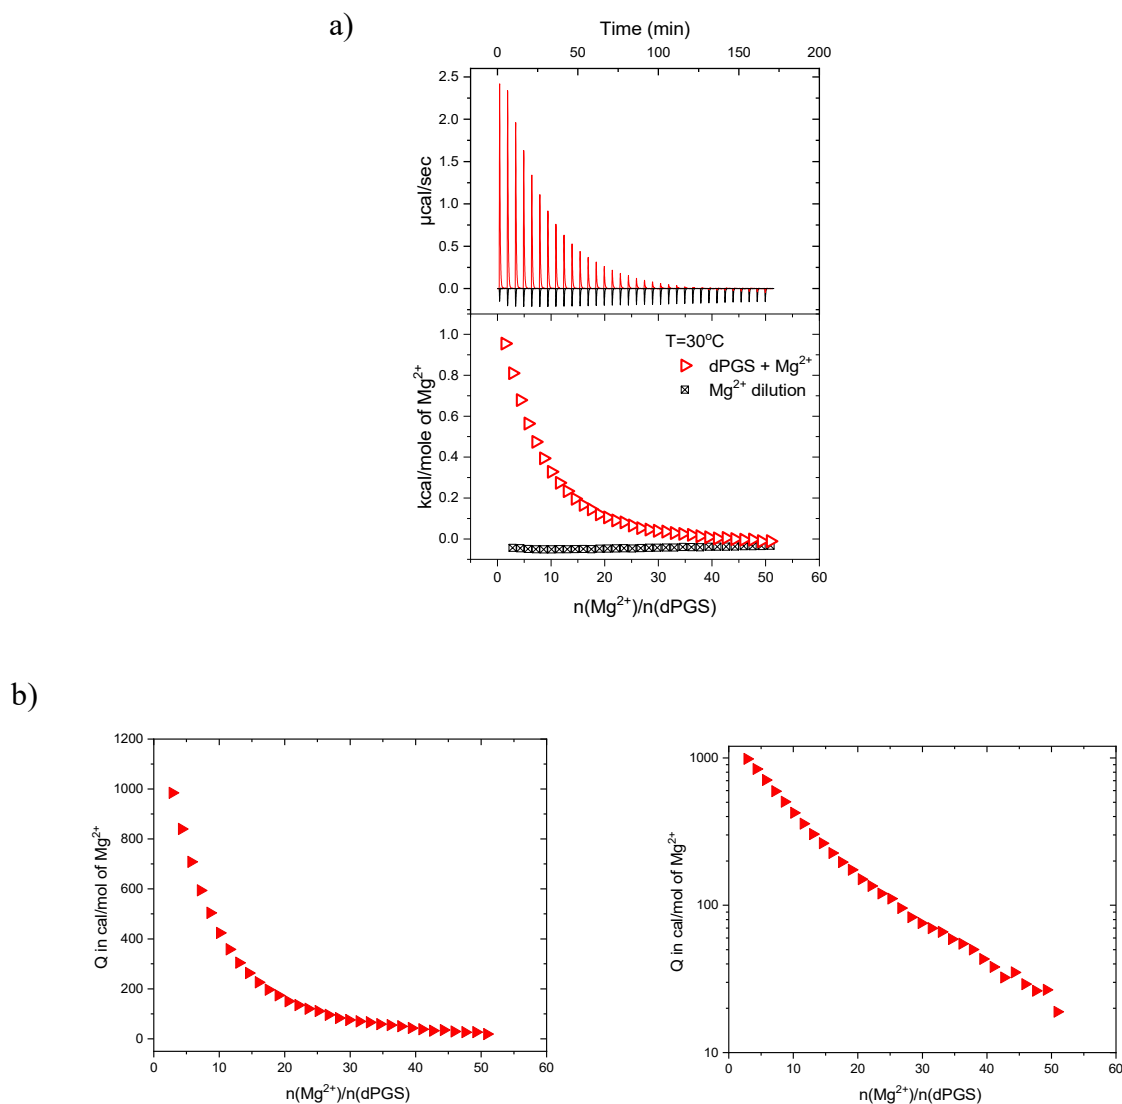

**Figure S4. (a)** ITC data for the binding of  $\text{Mg}^{2+}$  ions to dPGS at pH 7.2 and temperature of  $30^\circ\text{C}$  in 10 mM MOPS buffer. The upper panel shows the raw data of the binding (red spikes) and the dilution of  $\text{Mg}^{2+}$  by buffer (black spikes). The integrated heats of each injection are shown in the lower panel. **(b)** Binding isotherms for  $\text{Mg}^{2+}$  - dPGS interaction, presented on a typical ITC plot (left-handed) and semi-logarithmic plot (right-handed). Resulting  $[\text{Mg}^{2+}]_{\text{tot}}$ : 1.6 mM. Plots refer to section 3.2.

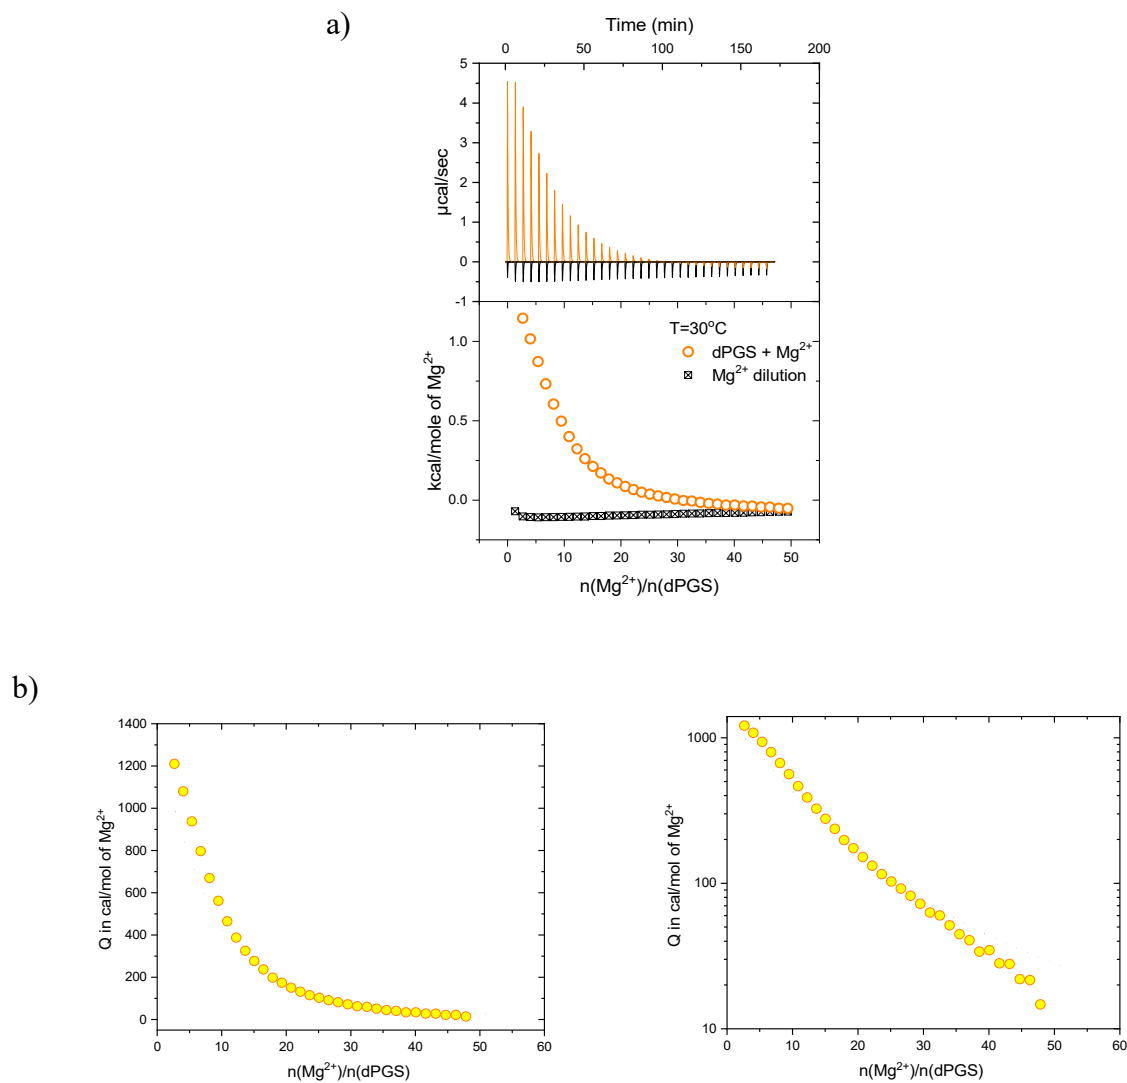

**Figure S5. (a)** ITC data for the binding of  $\text{Mg}^{2+}$  ions to dPGS at pH 7.2 and temperature of 30°C in 10 mM MOPS buffer. The upper panel shows the raw data of the binding (yellow spikes) and the dilution of  $\text{Mg}^{2+}$  by buffer (black spikes). The integrated heats of each injection are shown in the lower panel. **(b)** Binding isotherms for  $\text{Mg}^{2+}$  - dPGS interaction, presented in a typical ITC plot (left-handed) and semi-logarithmic plot (right-handed). Resulting  $[\text{Mg}^{2+}]_{\text{tot}}$ : 2.5 mM. Plots refer to section 3.2.

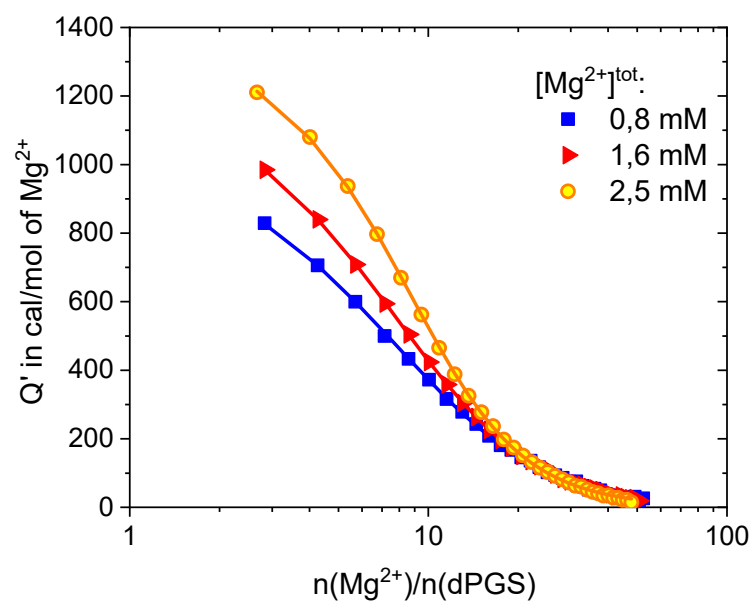

**Figure S6.** Binding isotherms for  $\text{Mg}^{2+}$  interacting with dPGS in semi-logarithmic plot. Solid lines represent the SSIS fit. Plot refer to section 3.2.

### High ionic strength (I = 31.5 mM)

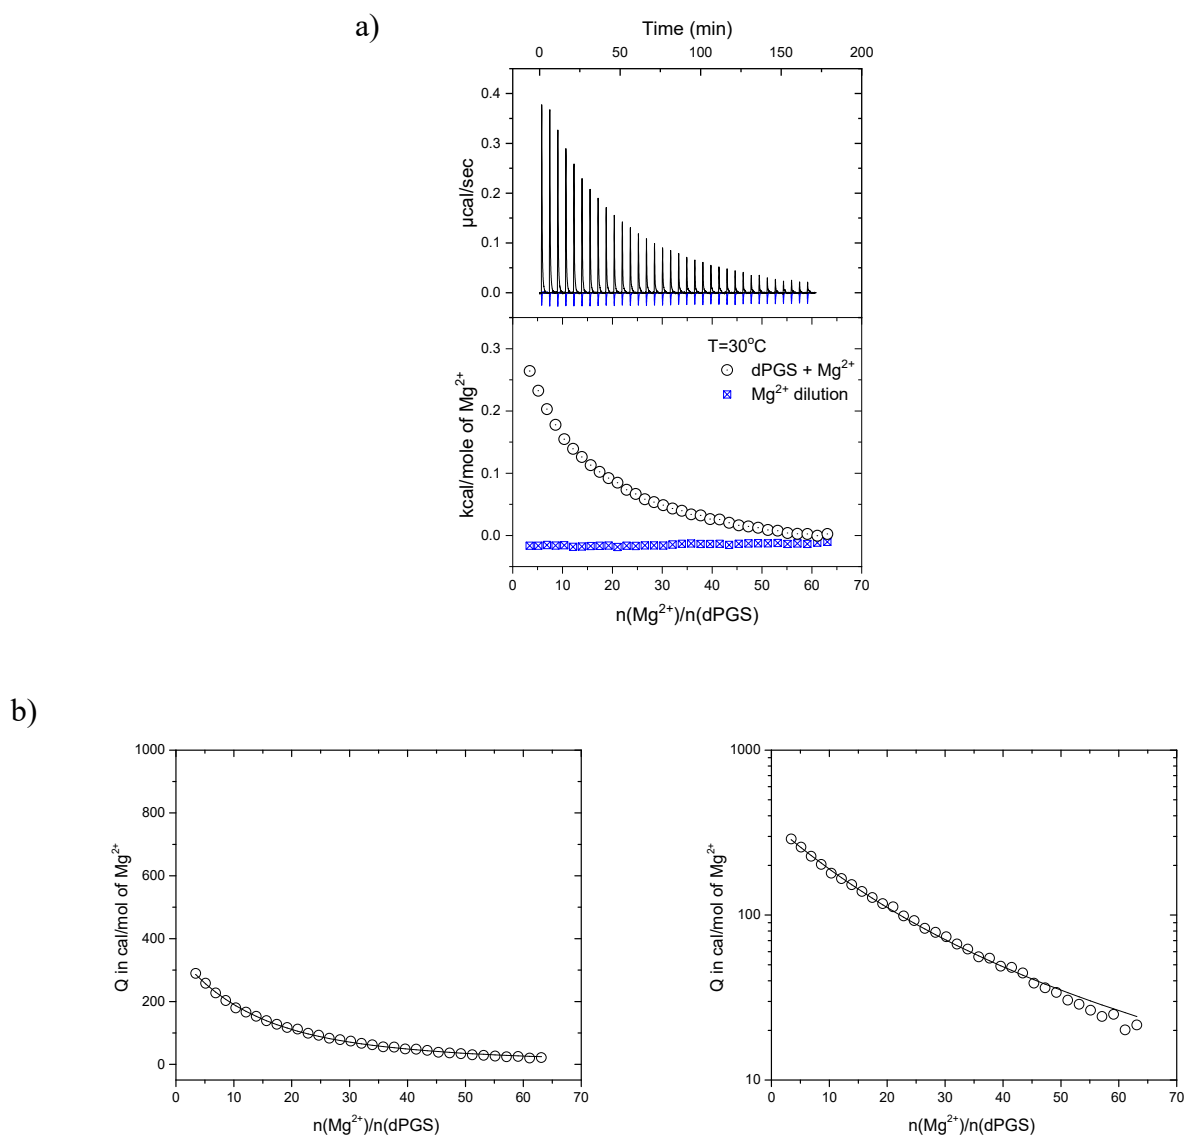

**Figure S7. (a)** ITC data for the binding of  $\text{Mg}^{2+}$  ions to dPGS at pH 7.2 and temperature of 30°C in 10 mM MOPS buffer. The upper panel shows the raw data of the binding (yellow spikes) and the dilution of  $\text{Mg}^{2+}$  by buffer (black spikes). The integrated heats of each injection are shown in the lower panel. **(b)** Binding isotherms for  $\text{Mg}^{2+}$  - dPGS interaction, presented in a typical ITC plot (left-handed) and semi-logarithmic plot (right-handed). Resulting  $[\text{Mg}^{2+}]^{\text{tot}}$ : 0.8 mM. Plots refer to section 3.2.

**Table S1.** Experimental parameters for dPGS-divalent ion measurements (at I = 31.5 mM), conducted on a VP-ITC instrument.

| System                       | Buffer/Ionic strength (mM) | $[\text{DI}]^{\text{tot a)}}$ (mM) | $[\text{Na}^+]^{\text{tot}}$ (mM) | T [K] | c (DI) <sup>b)</sup> (mM) | c (dPGS) (mM) |
|------------------------------|----------------------------|------------------------------------|-----------------------------------|-------|---------------------------|---------------|
| $\text{Mg}^{2+}/\text{dPGS}$ | MOPS/31.5                  | 0.8                                | 19.1                              | 303   | 5.0                       | 0.016         |

a) DI – divalent ion, b) concentration of divalent ions in the injectant.

### References

37. Indyk, L.; Fisher, H.F. [17] Theoretical aspects of isothermal titration calorimetry. In *Methods in Enzymology*; 1998; pp. 350–364.
38. Lin, L.N.; Mason, A.B.; Woodworth, R.C.; Brandts, J.F. Calorimetric studies of the binding of ferric ions to human serum transferrin. *Biochemistry* **1993**, 32, 9398–9406, doi:10.1021/bi00087a019.
